# Supplementary material for: A Novel Urine Exosomal lncRNA Assay to Improve the Detection of Prostate Cancer at Initial Biopsy: A Retrospective Multicenter Diagnostic Feasibility Study
Source: MDPI journal article supplement (doi:10.3390/cancers13164075), 2021-08-13
Supplement: s1 [file s1]

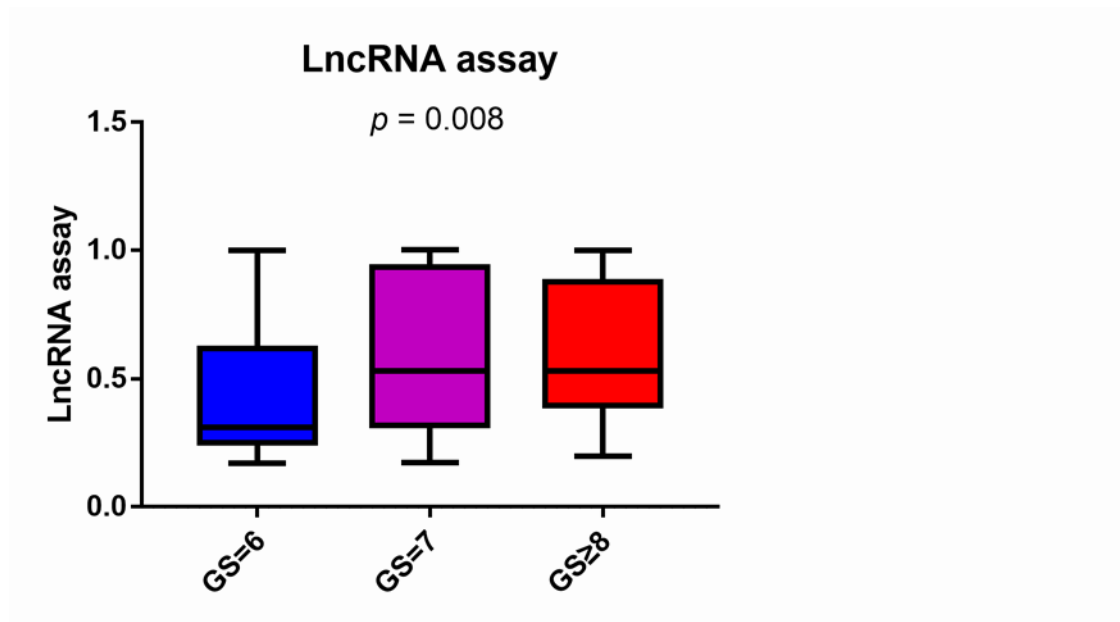

Supplementary Figure S1 The lncRNA assay was correlated with the malignancy grade of prostate cancer (PCa)

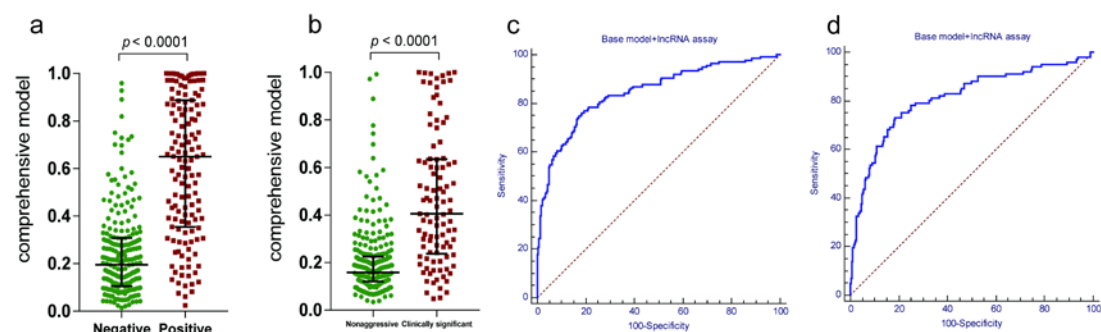

Supplementary Figure S2 The diagnosis performance of comprehensive model. a, The probability were significantly elevated in PCa patients than negative biopsy patients. b, The probability were significantly elevated in clinically significant PCa patients than non-aggressive disease patients. ROC analysis shows the diagnostic power of comprehensive model in PCa (c, AUC:0.846) and clinically significant PCa (e, AUC:0.811).

Table S1 The list of primers and probes

| NO; | Gene name       | Primer sequence           | Probe sequence                   |
|-----|-----------------|---------------------------|----------------------------------|
| 1   | <i>MALAT1-F</i> | AGTTTAAAGCAGTCGTATTTGTGA  | VIC-CCTCCCACCACCAGAAATG-MGB      |
|     | <i>MALAT1-R</i> | GTCACGTGATTTTAAGGTTGCATCT |                                  |
| 2   | <i>PCA3-F</i>   | AAGAAATAGCAAGTGCCGAGAA    | VIC-CAGATCTTCCTGGTCTCCCTC-MGB    |
|     | <i>PCA3-R</i>   | CATCAGGTCCTTCCCACCAT      |                                  |
| 3   | <i>ACTB-F</i>   | TGCGTTACACCCTTTCTT        | FAM-CAAAACCTAACTTGCGCAGAAAAC-MGB |
|     | <i>ACTB-R</i>   | CTGTCACCTTCACCGTTC        |                                  |
